# Supplementary material for: An Overview of Spike Surface Glycoprotein in Severe Acute Respiratory Syndrome–Coronavirus
Source: Front Mol Biosci. 2021 Mar 16;8:637550. doi: 10.3389/fmolb.2021.637550 (PMC8058706; doi:10.3389/fmolb.2021.637550)
Supplement: Supplementary file 2 [file Table1.DOC]

**Supplementary Information**

**An Overview of Spike Surface Glycoprotein in Severe Acute Respiratory Syndrome–Coronavirus**

Muthu Kumaradoss Kathiravan1,2#, Srimathi Radhakrishnan1,2#, Vigneshwaran Namasivayam3*, Senthilkumar Palaniappan4*

1Department of Pharmaceutical Chemistry, SRM College of Pharmacy, SRMIST, Kattankulathur, Kancheepuram 603 203. Tamil Nadu. India.

2Dr. APJ Abdul Kalam Research Lab, SRM College of Pharmacy, SRMIST, Kattankulathur, Kancheepuram 603 203. Tamil Nadu. India.

3Pharmaceutical Institute, University of Bonn, 53121 Bonn, Germany. vnamasiv@uni-bonn.de

4Faculty of Pharmacy, Karpagam Academy of Higher Education, Pollachi Main Road, Eachanari Post, Coimbatore 641 021. Tamil Nadu. India. drsenthilkumar.p@kahedu.edu.in.

#These authors contributed equally to this work

*Corresponding authors

**Supplementary Table S1. Summary of the crystal structures available for MERS-CoV, SARS-CoV-1 and SARS-CoV-2.**

|  |  | **SARS-CoV-2** | **MERS-CoV** | **SARS-CoV-1** | **Total** |
| --- | --- | --- | --- | --- | --- |
| **Method** | **cryo-EM** | 129 | 15 | 17 | 161 |
| **X-ray** | 29 | 23 | 22 | 74 |
|  | 158 | 38 | 39 | **235** |
|  | | | | | |
| **Release**  **Year** | **before 2015** | - | 3 | 18 | 21 |
| **2015** | - | 2 | - | 2 |
| **2016** | - | - | - | 0 |
| **2017** | - | 20 | 3 | 23 |
| **2018** | - | 3 | 12 | 15 |
| **2019** | - | 8 | 3 | 11 |
| **2020** | 158 | 2 | 3 | 163 |
| **Total number of reported structures** | | | | | **235** |

**Supplementary Table S2. List of crystal structure available for MERS-CoV, SARS-CoV-1, and SARS-CoV-2 with their PDB ID sorted according to their resolution, domain which co-crystallized as complex with the month and year released.**

| **PDB ID** | **Experimental Method** | **Release Year** | **Resolution (Å)** | **Domain** | **Complex** |
| --- | --- | --- | --- | --- | --- |
| **MERS-CoV** | | | | | |
| 5X4R | X-RAY | 2017 | 1.5 |  |  |
| 5GSB | X-RAY | 2017 | 1.8 |  |  |
| 5GSV | X-RAY | 2017 | 2.0 |  |  |
| 5VYH | X-RAY | 2017 | 2.0 | NTD |  |
| 6C6Z | X-RAY | 2018 | 2.1 | RBD |  |
| 5GSR | X-RAY | 2017 | 2.2 |  |  |
| 4NJL | X-RAY | 2014 | 2.3 |  |  |
| 6PXH | X-RAY | 2019 | 2.3 | NTD | Fab |
| 5GR7 | X-RAY | 2017 | 2.4 |  |  |
| 5DO2 | X-RAY | 2015 | 2.4 |  |  |
| 5GSX | X-RAY | 2017 | 2.5 |  |  |
| 6J2J | X-RAY | 2019 | 2.5 |  |  |
| 5GMQ | X-RAY | 2017 | 2.7 | RBD |  |
| 3D0G | X-RAY | 2008 | 2.8 | RBD | ACE2 |
| 5YY5 | X-RAY | 2018 | 2.8 | RBD |  |
| 7C02 | X-RAY | 2020 | 2.9 | RBD |  |
| 6J11 | X-RAY | 2019 | 3.0 | NTD |  |
| 4L72 | X-RAY | 2013 | 3.0 | RBD | DPP4 |
| 6L8Q | X-RAY | 2019 | 3.1 |  |  |
| 4ZS6 | X-RAY | 2015 | 3.2 | RBD |  |
| 5ZVK | X-RAY | 2019 | 3.3 | HR1 Motif | Pan-CoV’s inhibitor EK1 |
| 6WAR | X-RAY | 2020 | 3.4 | RBD |  |
| 5ZXV | X-RAY | 2018 | 4.5 | RBD |  |
| 6NB3 | cryo-EM | 2019 | 3.5 |  |  |
| 5W9I | cryo-EM | 2017 | 3.6 |  |  |
| 6NB4 | cryo-EM | 2019 | 3.6 |  |  |
| 5X59 | cryo-EM | 2017 | 3.7 | NTD |  |
| 5W9H | cryo-EM | 2017 | 4.0 |  |  |
| 5W9P | cryo-EM | 2017 | 4.0 |  |  |
| 5X5C | cryo-EM | 2017 | 4.1 |  |  |
| 6PZ8 | cryo-EM | 2019 | 4.2 |  |  |
| 5X5F | cryo-EM | 2017 | 4.2 |  |  |
| 5W9O | cryo-EM | 2017 | 4.5 |  |  |
| 5W9K | cryo-EM | 2017 | 4.6 |  |  |
| 5W9M | cryo-EM | 2017 | 4.7 |  |  |
| 5W9J | cryo-EM | 2017 | 4.8 |  |  |
| 5W9L | cryo-EM | 2017 | 4.8 |  |  |
| 5W9N | cryo-EM | 2017 | 5.0 |  |  |
| **SARS-CoV-1** | | | | | |
| 1ZVA | X-RAY | 2006 | 1.5 |  |  |
| 2BEQ | X-RAY | 2004 | 1.6 |  |  |
| 2BEZ | X-RAY | 2004 | 1.6 |  |  |
| 1ZVB | X-RAY | 2006 | 1.7 |  |  |
| 1ZV8 | X-RAY | 2006 | 1.9 |  |  |
| 1WYY | X-RAY | 2005 | 2.2 |  |  |
| 2GHV | X-RAY | 2006 | 2.2 | RBD |  |
| 5X4S | X-RAY | 2017 | 2.2 | NTD |  |
| 6WAQ | X-RAY | 2020 | 2.2 | RBD |  |
| 2DD8 | X-RAY | 2006 | 2.3 | RBD |  |
| 2GHW | X-RAY | 2006 | 2.3 | RBD |  |
| 7JN5 | X-RAY | 2020 | 2.7 | RBD |  |
| 1WNC | X-RAY | 2004 | 2.8 |  |  |
| 2AJF | X-RAY | 2005 | 2.9 | RBD |  |
| 3D0I | X-RAY | 2008 | 2.9 | RBD | ACE2 |
| 3SCI | X-RAY | 2012 | 2.9 | RBD | ACE2 |
| 3BGF | X-RAY | 2008 | 3.0 | RBD |  |
| 3SCJ | X-RAY | 2012 | 3.0 | RBD | ACE2 |
| 3SCK | X-RAY | 2012 | 3.0 | RBD | ACE2 |
| 3SCL | X-RAY | 2012 | 3.0 | RBD | ACE2 |
| 3D0H | X-RAY | 2008 | 3.1 | RBD | ACE2 |
| 5ZVM | X-RAY | 2019 | 3.3 | HR1 Motif | Pan-CoV’s inhibitor EK1 |
| 6CRV | cryo-EM | 2018 | 3.2 |  |  |
| 6CRZ | cryo-EM | 2018 | 3.3 |  |  |
| 6ACC | cryo-EM | 2018 | 3.6 |  | ACE2 |
| 5XLR | cryo-EM | 2017 | 3.8 |  |  |
| 6CS0 | cryo-EM | 2018 | 3.8 | CTD |  |
| 6ACD | cryo-EM | 2018 | 3.9 |  | ACE2 |
| 6CRW | cryo-EM | 2018 | 3.9 | CTD |  |
| 6CRX | cryo-EM | 2018 | 3.9 | CTD |  |
| 6M3W | cryo-EM | 2020 | 3.9 |  |  |
| 6ACJ | cryo-EM | 2018 | 4.2 |  | ACE2 |
| 6NB6 | cryo-EM | 2019 | 4.2 |  |  |
| 5WRG | cryo-EM | 2017 | 4.3 |  |  |
| 6CS2 | cryo-EM | 2018 | 4.4 |  | ACE2 |
| 6ACK | cryo-EM | 2018 | 4.5 |  | ACE2 |
| 6NB7 | cryo-EM | 2019 | 4.5 |  |  |
| 6CS1 | cryo-EM | 2018 | 4.6 | CTD |  |
| 6ACG | cryo-EM | 2018 | 5.4 |  | ACE2 |
| **SARS-CoV-2** | | | | | |
| 6M1V | X-RAY | 2020 | 1.5 |  |  |
| 6YZ5 | X-RAY | 2020 | 1.8 | RBD |  |
| 6ZBP | X-RAY | 2020 | 1.9 |  |  |
| 6XC4 | X-RAY | 2020 | 2.3 | RBD |  |
| 6YLA | X-RAY | 2020 | 2.4 | RBD |  |
| 6M0J | X-RAY | 2020 | 2.5 | RBD | ACE2 |
| 6LVN | X-RAY | 2020 | 2.5 | HR2 Domain | |
| 6LZG | X-RAY | 2020 | 2.5 | RBD |  |
| 6XKQ | X-RAY | 2020 | 2.6 | RBD |  |
| 6ZCZ | X-RAY | 2020 | 2.7 |  |  |
| 7JX3 | X-RAY | 2020 | 2.7 |  |  |
| 6VW1 | X-RAY | 2020 | 2.7 | RBD | ACE2 |
| 6XC3 | X-RAY | 2020 | 2.7 | RBD |  |
| 6Z2M | X-RAY | 2020 | 2.7 | RBD |  |
| 6XKP | X-RAY | 2020 | 2.7 | RBD |  |
| 6XE1 | X-RAY | 2020 | 2.8 | RBD |  |
| 7C01 | X-RAY | 2020 | 2.9 | RBD |  |
| 6XC7 | X-RAY | 2020 | 2.9 | RBD |  |
| 6LXT | X-RAY | 2020 | 2.9 |  |  |
| 7K9Z | X-RAY | 2020 | 3.0 | RBD |  |
| 6W41 | X-RAY | 2020 | 3.1 | RBD |  |
| 6ZLR | X-RAY | 2020 | 3.1 | RBD |  |
| 6XC2 | X-RAY | 2020 | 3.1 |  |  |
| 7K8M | X-RAY | 2020 | 3.2 | RBD |  |
| 7JVB | X-RAY | 2020 | 3.3 | RBD |  |
| 6YZ7 | X-RAY | 2020 | 3.3 | RBD |  |
| 6ZH9 | X-RAY | 2020 | 3.3 | RBD |  |
| 6ZER | X-RAY | 2020 | 3.8 |  |  |
| 6YM0 | X-RAY | 2020 | 4.4 | RBD |  |
| 6XLU | cryo-EM | 2020 | 2.4 |  |  |
| 7JWY | cryo-EM | 2020 | 2.5 |  |  |
| 6ZGE | cryo-EM | 2020 | 2.6 |  |  |
| 7K43 | cryo-EM | 2020 | 2.6 |  |  |
| 6X29 | cryo-EM | 2020 | 2.7 |  |  |
| 6XM0 | cryo-EM | 2020 | 2.7 |  |  |
| 7DF3 | cryo-EM | 2020 | 2.7 |  | ACE2 |
| 7JZL | cryo-EM | 2020 | 2.7 |  |  |
| 7A4N | cryo-EM | 2020 | 2.8 |  |  |
| 6VXX | cryo-EM | 2020 | 2.8 |  |  |
| 7KDK | cryo-EM | 2020 | 2.8 | RBD |  |
| 6ZB5 | cryo-EM | 2020 | 2.9 |  |  |
| 7KKL | cryo-EM | 2020 | 2.9 |  |  |
| 6M17 | cryo-EM | 2020 | 2.9 | RBD | ACE2 |
| 6X79 | cryo-EM | 2020 | 2.9 |  |  |
| 6XM3 | cryo-EM | 2020 | 2.9 | RBD |  |
| 6XM4 | cryo-EM | 2020 | 2.9 | RBD |  |
| 6XR8 | cryo-EM | 2020 | 2.9 |  |  |
| 6ZGI | cryo-EM | 2020 | 2.9 |  |  |
| 7AD1 | cryo-EM | 2020 | 2.9 |  |  |
| 6ZXN | cryo-EM | 2020 | 2.9 |  |  |
| 7A29 | cryo-EM | 2020 | 2.9 |  |  |
| 7KDL | cryo-EM | 2020 | 3.0 | RBD |  |
| 6XRA | cryo-EM | 2020 | 3.0 |  |  |
| 6ZOW | cryo-EM | 2020 | 3.0 |  |  |
| 6ZOX | cryo-EM | 2020 | 3.0 |  |  |
| 6ZP0 | cryo-EM | 2020 | 3.0 |  |  |
| 7DDD | cryo-EM | 2020 | 3.0 |  |  |
| 7JV6 | cryo-EM | 2020 | 3.0 |  |  |
| 7KDG | cryo-EM | 2020 | 3.0 | RBD |  |
| 6ZB4 | cryo-EM | 2020 | 3.0 |  |  |
| 7KKK | cryo-EM | 2020 | 3.0 |  |  |
| 7A25 | cryo-EM | 2020 | 3.1 |  |  |
| 7KE9 | cryo-EM | 2020 | 3.1 | RBD |  |
| 6WPS | cryo-EM | 2020 | 3.1 |  |  |
| 6XM5 | cryo-EM | 2020 | 3.1 | RBD |  |
| 6ZOY | cryo-EM | 2020 | 3.1 |  |  |
| 6ZP2 | cryo-EM | 2020 | 3.1 |  |  |
| 6ZP5 | cryo-EM | 2020 | 3.1 |  |  |
| 7C2L | cryo-EM | 2020 | 3.1 |  |  |
| 7JZN | cryo-EM | 2020 | 3.1 |  |  |
| 7JZU | cryo-EM | 2020 | 3.1 |  |  |
| 7KE6 | cryo-EM | 2020 | 3.1 | RBD |  |
| 7L09 | cryo-EM | 2020 | 3.1 |  |  |
| 6VYB | cryo-EM | 2020 | 3.2 |  |  |
| 6X2C | cryo-EM | 2020 | 3.2 | RBD |  |
| 7JWB | cryo-EM | 2020 | 3.2 |  |  |
| 7L02 | cryo-EM | 2020 | 3.2 |  |  |
| 6XKL | cryo-EM | 2020 | 3.2 | RBD |  |
| 7KE4 | cryo-EM | 2020 | 3.2 | RBD |  |
| 6X6P | cryo-EM | 2020 | 3.2 |  |  |
| 7K90 | cryo-EM | 2020 | 3.2 |  |  |
| 6XEY | cryo-EM | 2020 | 3.3 |  |  |
| 7KDI | cryo-EM | 2020 | 3.3 | RBD |  |
| 7KE8 | cryo-EM | 2020 | 3.3 | RBD |  |
| 6X2A | cryo-EM | 2020 | 3.3 | RBD |  |
| 6YOR | cryo-EM | 2020 | 3.3 |  |  |
| 6Z43 | cryo-EM | 2020 | 3.3 |  |  |
| 6ZP1 | cryo-EM | 2020 | 3.3 |  |  |
| 6ZP7 | cryo-EM | 2020 | 3.3 |  |  |
| 7K4N | cryo-EM | 2020 | 3.3 |  |  |
| 7L06 | cryo-EM | 2020 | 3.3 |  |  |
| 7KE7 | cryo-EM | 2020 | 3.3 | RBD |  |
| 7KDH | cryo-EM | 2020 | 3.3 | RBD |  |
| 7KEA | cryo-EM | 2020 | 3.3 | RBD |  |
| 7KMB | cryo-EM | 2020 | 3.4 |  |  |
| 6Z97 | cryo-EM | 2020 | 3.4 |  |  |
| 7JV4 | cryo-EM | 2020 | 3.4 |  |  |
| 7K8S | cryo-EM | 2020 | 3.4 |  |  |
| 7K8T | cryo-EM | 2020 | 3.4 |  |  |
| 7KJ4 | cryo-EM | 2020 | 3.4 |  |  |
| 6XCM | cryo-EM | 2020 | 3.4 |  |  |
| 6XF5 | cryo-EM | 2020 | 3.5 | RBD |  |
| 6VSB | cryo-EM | 2020 | 3.5 | RBD |  |
| 7KEB | cryo-EM | 2020 | 3.5 | RBD |  |
| 7KDJ | cryo-EM | 2020 | 3.5 | RBD |  |
| 6ZOZ | cryo-EM | 2020 | 3.5 |  |  |
| 6ZWV | cryo-EM | 2020 | 3.5 | RBD |  |
| 7JV2 | cryo-EM | 2020 | 3.5 |  |  |
| 7JZM | cryo-EM | 2020 | 3.5 |  |  |
| 7K8Z | cryo-EM | 2020 | 3.5 |  |  |
| 6X2B | cryo-EM | 2020 | 3.6 | RBD |  |
| 7A91 | cryo-EM | 2020 | 3.6 |  | ACE2 |
| 7JVA | cryo-EM | 2020 | 3.6 | RBD |  |
| 7KJ2 | cryo-EM | 2020 | 3.6 |  |  |
| 7KJ5 | cryo-EM | 2020 | 3.6 | RBD |  |
| 7KMZ | cryo-EM | 2020 | 3.6 |  | ACE2 |
| 7KMS | cryo-EM | 2020 | 3.6 |  |  |
| 6XCN | cryo-EM | 2020 | 3.7 |  |  |
| 6WPT | cryo-EM | 2020 | 3.7 |  |  |
| 6XS6 | cryo-EM | 2020 | 3.7 |  |  |
| 6ZDH | cryo-EM | 2020 | 3.7 |  |  |
| 7A5R | cryo-EM | 2020 | 3.7 |  |  |
| 7K45 | cryo-EM | 2020 | 3.7 | RBD |  |
| 7KJ3 | cryo-EM | 2020 | 3.7 |  |  |
| 7KNH | cryo-EM | 2020 | 3.7 |  | ACE2 |
| 6ZGG | cryo-EM | 2020 | 3.8 | RBD |  |
| 7DF4 | cryo-EM | 2020 | 3.8 |  |  |
| 7DK4 | cryo-EM | 2020 | 3.8 | RBD |  |
| 7K8U | cryo-EM | 2020 | 3.8 |  |  |
| 7KEC | cryo-EM | 2020 | 3.8 | RBD |  |
| 7KNE | cryo-EM | 2020 | 3.9 |  | ACE2 |
| 6XDG | cryo-EM | 2020 | 3.9 | RBD |  |
| 7A5S | cryo-EM | 2020 | 3.9 |  |  |
| 7A94 | cryo-EM | 2020 | 3.9 |  | ACE2 |
| 7K8X | cryo-EM | 2020 | 3.9 |  |  |
| 7KNI | cryo-EM | 2020 | 3.9 |  | ACE2 |
| 7KNB | cryo-EM | 2020 | 3.9 |  | ACE2 |
| 6XF6 | cryo-EM | 2020 | 4.0 | RBD |  |
| 7KL9 | cryo-EM | 2020 | 4.1 |  |  |
| 7A92 | cryo-EM | 2020 | 4.2 |  | ACE2 |
| 7A95 | cryo-EM | 2020 | 4.3 | RBD | ACE2 |
| 7DCC | cryo-EM | 2020 | 4.3 | RBD |  |
| 7DK6 | cryo-EM | 2020 | 4.3 | RBD |  |
| 6ZFO | cryo-EM | 2020 | 4.4 |  |  |
| 7A97 | cryo-EM | 2020 | 4.4 |  | ACE2 |
| 7K8Y | cryo-EM | 2020 | 4.4 |  |  |
| 6ZDG | cryo-EM | 2020 | 4.7 |  |  |
| 7A96 | cryo-EM | 2020 | 4.8 | RBD | ACE2 |
| 7A98 | cryo-EM | 2020 | 5.4 |  | ACE2 |
| 7DD2 | cryo-EM | 2020 | 5.6 | RBD |  |
| 7A93 | cryo-EM | 2020 | 5.9 | RBD |  |
| 7DCX | cryo-EM | 2020 | 5.9 | RBD |  |
| 7DK3 | cryo-EM | 2020 | 6.0 |  |  |
| 7DDN | cryo-EM | 2020 | 6.3 |  |  |
| 6ZGH | cryo-EM | 2020 | 6.8 |  |  |
| 7DD8 | cryo-EM | 2020 | 7.5 | RBD |  |
| 7DK7 | cryo-EM | 2020 | 9.7 | RBD |  |
| 7DK5 | cryo-EM | 2020 | 13.5 | RBD |  |
